# Supplementary material for: Ligand Engineering Triggered Efficiency Tunable Emission in Zero-Dimensional Manganese Hybrids for White Light-Emitting Diodes
Source: MDPI journal article supplement (doi:10.3390/nano12183142), 2022-09-10
Supplement: s1 [file s1]

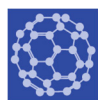

## Supplementary Materials

# Ligand Engineering Triggered Efficiency Tunable Emission in Zero-Dimensional Manganese Hybrids for White Light-Emitting Diodes

Qiqiong Ren <sup>1</sup>, Jian Zhang <sup>1</sup>, Yilin Mao <sup>1</sup>, Maxim S. Molokeev <sup>2,3,4</sup>, Guojun Zhou <sup>1,\*</sup> and Xian-Ming Zhang <sup>1,5,\*</sup><sup>1</sup> Key Laboratory of Magnetic Molecules and Magnetic Information Materials (Ministry of Education), School of Chemistry and Material Science, Shanxi Normal University, Taiyuan 030031, China<sup>2</sup> Laboratory of Crystal Physics, Kirensky Institute of Physics, Federal Research Center KSC SB RAS, 660036 Krasnoyarsk, Russia<sup>3</sup> Research and Development Department, Kemerovo State University, 650000 Kemerovo, Russia<sup>4</sup> Department of Physics, Far Eastern State Transport University, 680021 Khabarovsk, Russia<sup>5</sup> Key Laboratory of Interface Science and Engineering in Advanced Material (Ministry of Education), College of Chemistry & Chemical Engineering, Taiyuan University of Technology, Taiyuan 030024, China

\* Correspondence: zhougj@sxnu.edu.cn (G.Z.); zhangxm@dns.sxnu.edu.cn (X.-M.Z.)

**Citation:** Ren, Q.; Zhang, J.; Mao, Y.; Molokeev, M.S.; Zhou, G.; Zhang, X.-M. Ligand Engineering Triggered Efficiency Tunable Emission in Zero-Dimensional Manganese Hybrids for White Light-Emitting Diodes. *Nanomaterials* **2022**, *12*, 3142. <https://doi.org/10.3390/nano12183142>

Academic Editors: Aurora Rizzo and Bouchta Sahraoui

Received: 14 August 2022

Accepted: 7 September 2022

Published: 10 September 2022

**Publisher's Note:** MDPI stays neutral with regard to jurisdictional claims in published maps and institutional affiliations.

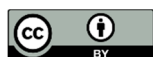

**Copyright:** © 2022 by the authors. Licensee MDPI, Basel, Switzerland. This article is an open access article distributed under the terms and conditions of the Creative Commons Attribution (CC BY) license (<https://creativecommons.org/licenses/by/4.0/>).

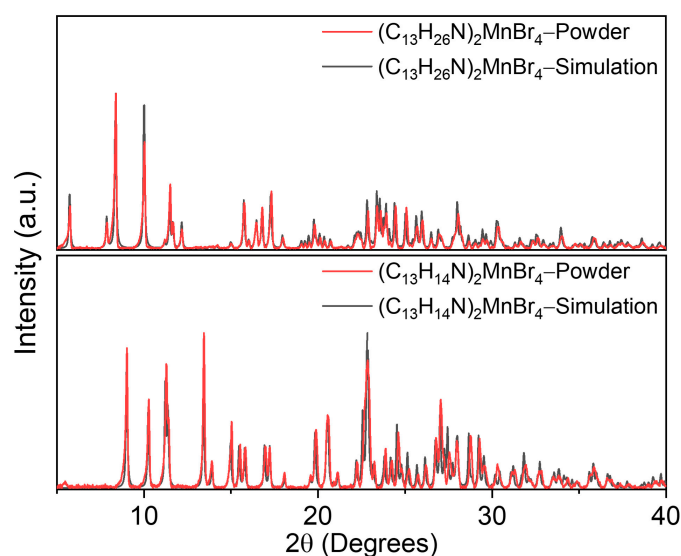

**Figure S1.** PXRD patterns and standard diffraction pattern of  $(C_{13}H_{14}N)_2MnBr_4$  and  $(C_{13}H_{26}N)_2MnBr_4$ .

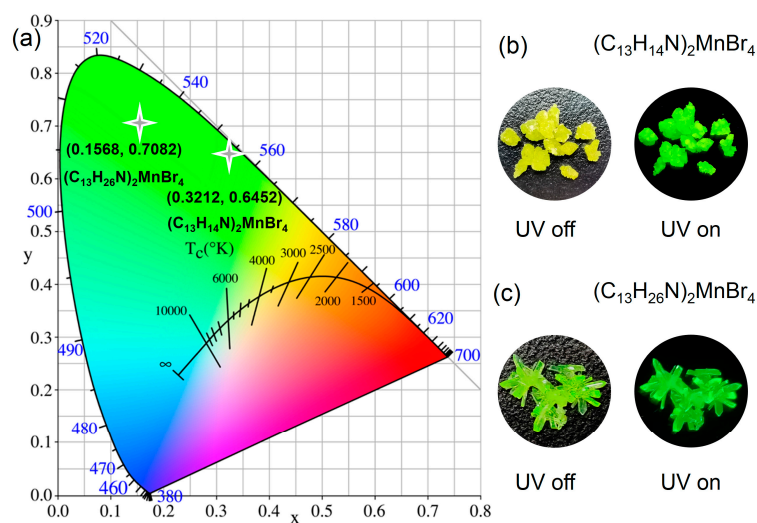

**Figure S2.** (a) The CIE chromaticity diagrams of  $(\text{C}_{13}\text{H}_{14}\text{N})_2\text{MnBr}_4$  and  $(\text{C}_{13}\text{H}_{26}\text{N})_2\text{MnBr}_4$ . (b, c) The photographs of  $(\text{C}_{13}\text{H}_{14}\text{N})_2\text{MnBr}_4$  (top) and  $(\text{C}_{13}\text{H}_{26}\text{N})_2\text{MnBr}_4$  (bottom) with UV off and on.

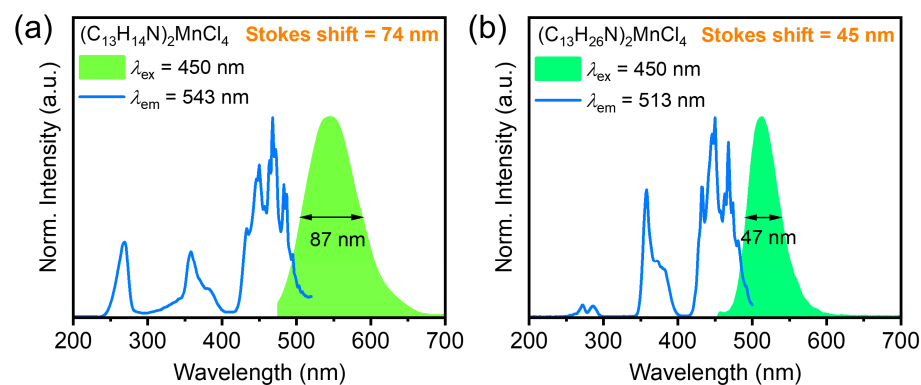

**Figure S3.** Normalized PLE and PL spectra of (a)  $(\text{C}_{13}\text{H}_{14}\text{N})_2\text{MnCl}_4$  and (b)  $(\text{C}_{13}\text{H}_{26}\text{N})_2\text{MnCl}_4$ .

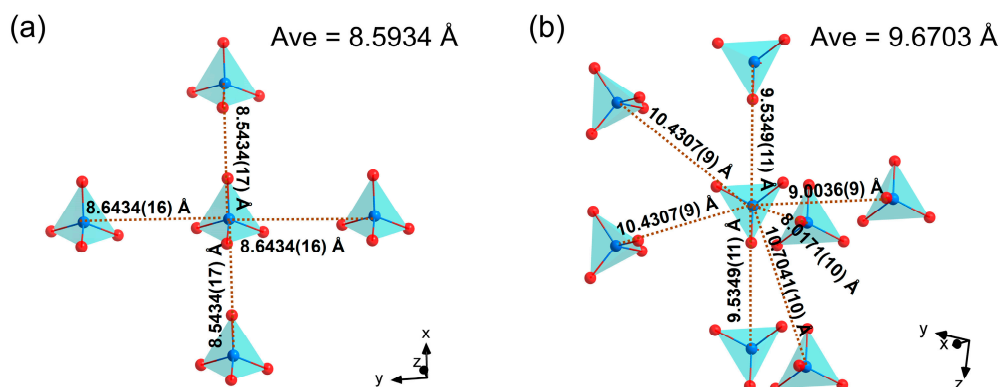

**Figure S4.** The schematic diagrams of Mn...Mn distance in (a)  $(\text{C}_{13}\text{H}_{14}\text{N})_2\text{MnBr}_4$  and (b)  $(\text{C}_{13}\text{H}_{26}\text{N})_2\text{MnBr}_4$ .

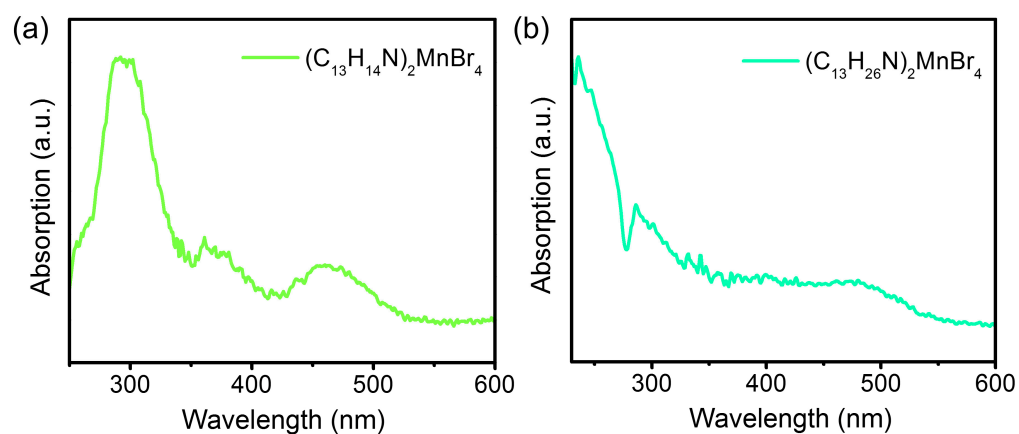

**Figure S5.** Absorption spectra of (a)  $(C_{13}H_{14}N)_2MnBr_4$  and (b)  $(C_{13}H_{26}N)_2MnBr_4$ .

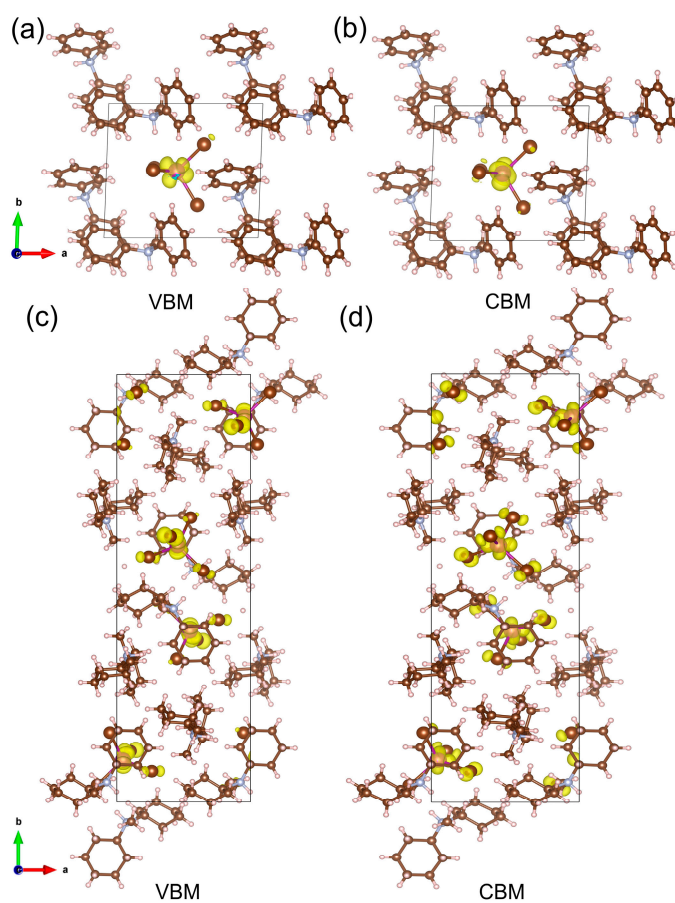

**Figure S6.** VBM- and CBM-associated charge densities of (a, b)  $(C_{13}H_{14}N)_2MnBr_4$  and (c, d)  $(C_{13}H_{26}N)_2MnBr_4$ .

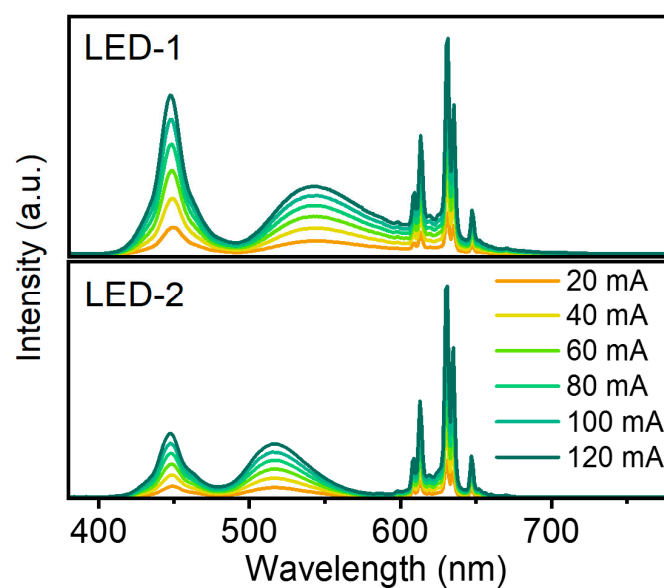

**Figure S7.** PL spectra of the WLED devices excited at different current (20–120 mA).

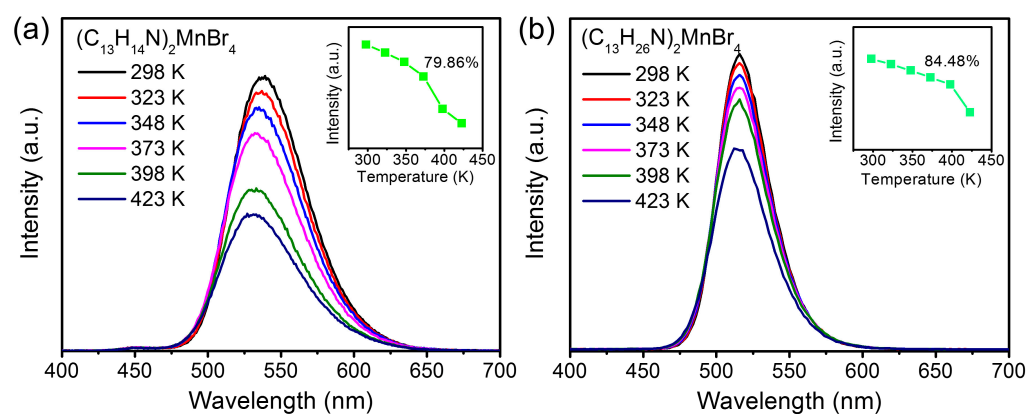

**Figure S8.** Temperature-dependent PL spectra of (a)  $(C_{13}H_{14}N)_2MnBr_4$  and (b)  $(C_{13}H_{26}N)_2MnBr_4$  under 450 nm excitation ranging from 298 K to 423 K.

**Table S1.** The bond length (Å) of (C<sub>13</sub>H<sub>14</sub>N)<sub>2</sub>MnBr<sub>4</sub> and (C<sub>13</sub>H<sub>26</sub>N)<sub>2</sub>MnBr<sub>4</sub>.

| (C <sub>13</sub> H <sub>14</sub> N) <sub>2</sub> MnBr <sub>4</sub> |             |               |            |
|--------------------------------------------------------------------|-------------|---------------|------------|
| Atom–Atom                                                          | Length/Å    | Atom–Atom     | Length/Å   |
| Br (3)–Mn (1)                                                      | 2.4915 (13) | C (16)–C (15) | 1.384 (14) |
| Br (1)–Mn (1)                                                      | 2.5201 (13) | C (9)–C (8)   | 1.369 (14) |
| Br (4)–Mn (1)                                                      | 2.5199 (12) | C (9)–C (10)  | 1.361 (13) |
| Br (2)–Mn (1)                                                      | 2.4829 (13) | C (14)–C (15) | 1.376 (12) |
| N (1)–C (19)                                                       | 1.486 (9)   | C (6)–C (5)   | 1.392 (19) |
| N (1)–C (20)                                                       | 1.515 (11)  | C (23)–C (22) | 1.398 (13) |
| N (1)–C (21)                                                       | 1.496 (9)   | C (23)–C (24) | 1.369 (19) |
| N (2)–C (1)                                                        | 1.501 (9)   | C (11)–C (10) | 1.389 (16) |
| N (2)–C (7)                                                        | 1.491 (12)  | C (11)–C (12) | 1.37 (2)   |
| N (2)–C (8)                                                        | 1.479 (9)   | C (5)–C (4)   | 1.37 (2)   |
| C (18)–C (19)                                                      | 1.371 (10)  | C (8)–C (13)  | 1.383 (14) |
| C (18)–C (17)                                                      | 1.397 (12)  | C (22)–C (21) | 1.375 (10) |
| C (1)–C (2)                                                        | 1.332 (13)  | C (21)–C (26) | 1.361 (13) |
| C (1)–C (6)                                                        | 1.360 (13)  | C (26)–C (25) | 1.403 (15) |
| C (19)–C (14)                                                      | 1.393 (9)   | C (24)–C (25) | 1.369 (18) |
| C (2)–C (3)                                                        | 1.403 (13)  | C (3)–C (4)   | 1.333 (18) |
| C (17)–C (16)                                                      | 1.369 (13)  | C (13)–C (12) | 1.392 (16) |
| (C <sub>13</sub> H <sub>26</sub> N) <sub>2</sub> MnBr <sub>4</sub> |             |               |            |
| Atom–Atom                                                          | Length/Å    | Atom–Atom     | Length/Å   |
| Br (01)–Mn (1)                                                     | 2.4976 (9)  | C (8)–C (13)  | 1.516 (11) |
| Br (02)–Mn (1)                                                     | 2.5226 (9)  | C (8)–C (9)   | 1.483 (10) |
| Br (03)–Mn (1)                                                     | 2.5099 (9)  | C (13)–C (12) | 1.523 (13) |
| Br (04)–Mn (1)                                                     | 2.4704 (9)  | C (22)–C (23) | 1.522 (11) |
| N (1)–C (14)                                                       | 1.510 (6)   | C (15)–C (16) | 1.528 (10) |
| N (1)–C (21)                                                       | 1.531 (6)   | C (19)–C (18) | 1.560 (11) |
| N (1)–C (20)                                                       | 1.508 (6)   | C (1)–C (2)   | 1.559 (15) |
| C (14)–C (15)                                                      | 1.513 (8)   | C (25)–C (24) | 1.483 (12) |
| C (14)–C (19)                                                      | 1.498 (8)   | C (24)–C (23) | 1.515 (12) |
| C (21)–C (26)                                                      | 1.511 (7)   | C (2)–C (3)   | 1.476 (17) |
| C (21)–C (22)                                                      | 1.489 (8)   | C (16)–C (17) | 1.477 (14) |
| C (26)–C (25)                                                      | 1.519 (8)   | C (10)–C (9)  | 1.502 (11) |
| N (2)–C (6)                                                        | 1.578 (10)  | C (10)–C (11) | 1.494 (15) |
| N (2)–C (8)                                                        | 1.460 (9)   | C (5)–C (4)   | 1.463 (15) |
| N (2)–C (7)                                                        | 1.481 (9)   | C (18)–C (17) | 1.467 (15) |
| C (6)–C (1)                                                        | 1.503 (9)   | C (11)–C (12) | 1.469 (15) |
| C (6)–C (5)                                                        | 1.487 (10)  | C (3)–C (4)   | 1.536 (14) |

**Table S2.** The bond angles (°) of (C<sub>13</sub>H<sub>14</sub>N)<sub>2</sub>MnBr<sub>4</sub> and (C<sub>13</sub>H<sub>26</sub>N)<sub>2</sub>MnBr<sub>4</sub>.

| (C <sub>13</sub> H <sub>14</sub> N) <sub>2</sub> MnBr <sub>4</sub> |            |                      |            |
|--------------------------------------------------------------------|------------|----------------------|------------|
| Atom–Atom–Atom                                                     | Angle/°    | Atom–Atom–Atom       | Angle/°    |
| Br (3)–Mn (1)–Br (1)                                               | 108.56 (4) | C (10)–C (9)–C (8)   | 118.5 (9)  |
| Br (3)–Mn (1)–Br (4)                                               | 110.62 (4) | C (15)–C (14)–C (19) | 117.9 (7)  |
| Br (4)–Mn (1)–Br (1)                                               | 110.25 (5) | C (1)–C (6)–C (5)    | 118.5 (11) |
| Br (2)–Mn (1)–Br (3)                                               | 117.83 (6) | C (24)–C (23)–C (22) | 120.2 (9)  |
| Br (2)–Mn (1)–Br (1)                                               | 106.14 (5) | C (12)–C (11)–C (10) | 119.2 (9)  |
| Br (2)–Mn (1)–Br (4)                                               | 103.19 (5) | C (4)–C (5)–C (6)    | 119.5 (9)  |
| C (19)–N (1)–C (20)                                                | 113.1 (6)  | C (9)–C (8)–N (2)    | 116.3 (7)  |

|                      |           |                      |            |
|----------------------|-----------|----------------------|------------|
| C (19)–N (1)–C (21)  | 110.9 (5) | C (9)–C (8)–C (13)   | 122.4 (8)  |
| C (21)–N (1)–C (20)  | 114.2 (6) | C (13)–C (8)–N (2)   | 121.3 (9)  |
| C (7)–N (2)–C (1)    | 111.9 (8) | C (21)–C (22)–C (23) | 118.0 (9)  |
| C (8)–N (2)–C (1)    | 111.4 (5) | C (9)–C (10)–C (11)  | 121.4 (11) |
| C (8)–N (2)–C (7)    | 114.8 (7) | C (22)–C (21)–N (1)  | 121.2 (7)  |
| C (19)–C (18)–C (17) | 119.5 (7) | C (26)–C (21)–N (1)  | 116.4 (6)  |
| C (2)–C (1)–N (2)    | 117.1 (7) | C (26)–C (21)–C (22) | 122.4 (8)  |
| C (2)–C (1)–C (6)    | 122.7 (8) | C (21)–C (26)–C (25) | 119.0 (9)  |
| C (6)–C (1)–N (2)    | 120.2 (8) | C (23)–C (24)–C (25) | 121.1 (10) |
| C (18)–C (19)–N (1)  | 118.5 (6) | C (4)–C (3)–C (2)    | 120.9 (11) |
| C (18)–C (19)–C (14) | 121.4 (7) | C (14)–C (15)–C (16) | 121.6 (8)  |
| C (14)–C (19)–N (1)  | 120.1 (6) | C (3)–C (4)–C (5)    | 120.3 (10) |
| C (1)–C (2)–C (3)    | 118.1 (9) | C (24)–C (25)–C (26) | 119.2 (11) |
| C (16)–C (17)–C (18) | 119.9 (8) | C (8)–C (13)–C (12)  | 117.7 (12) |
| C (17)–C (16)–C (15) | 119.7 (8) | C (11)–C (12)–C (13) | 120.9 (10) |

**(C<sub>13</sub>H<sub>26</sub>N)<sub>2</sub>MnBr<sub>4</sub>**

| Atom–Atom–Atom         | Angle/°    | Atom–Atom–Atom       | Angle/°    |
|------------------------|------------|----------------------|------------|
| Br (01)–Mn (1)–Br (02) | 108.61 (3) | N (2)–C (8)–C (13)   | 110.4 (6)  |
| Br (01)–Mn (1)–Br (03) | 107.07 (3) | N (2)–C (8)–C (9)    | 115.6 (6)  |
| Br (03)–Mn (1)–Br (02) | 108.34 (3) | C (9)–C (8)–C (13)   | 110.3 (6)  |
| Br (04)–Mn (1)–Br (01) | 114.21 (4) | C (8)–C (13)–C (12)  | 115.6 (8)  |
| Br (04)–Mn (1)–Br (02) | 109.38 (4) | C (21)–C (22)–C (23) | 110.0 (6)  |
| Br (04)–Mn (1)–Br (03) | 109.07 (4) | C (14)–C (15)–C (16) | 110.4 (6)  |
| C (14)–N (1)–C (21)    | 118.7 (4)  | C (14)–C (19)–C (18) | 109.3 (6)  |
| C (20)–N (1)–C (14)    | 113.5 (4)  | C (6)–C (1)–C (2)    | 109.0 (7)  |
| C (20)–N (1)–C (21)    | 109.3 (4)  | C (24)–C (25)–C (26) | 114.3 (6)  |
| N (1)–C (14)–C (15)    | 108.5 (4)  | C (25)–C (24)–C (23) | 113.3 (6)  |
| C (19)–C (14)–N (1)    | 114.6 (4)  | C (24)–C (23)–C (22) | 110.3 (7)  |
| C (19)–C (14)–C (15)   | 112.4 (5)  | C (3)–C (2)–C (1)    | 113.3 (7)  |
| C (26)–C (21)–N (1)    | 110.7 (4)  | C (17)–C (16)–C (15) | 113.3 (8)  |
| C (22)–C (21)–N (1)    | 117.0 (4)  | C (11)–C (10)–C (9)  | 114.4 (8)  |
| C (22)–C (21)–C (26)   | 112.9 (5)  | C (4)–C (5)–C (6)    | 112.1 (9)  |
| C (21)–C (26)–C (25)   | 109.4 (5)  | C (17)–C (18)–C (19) | 111.6 (7)  |
| C (8)–N (2)–C (6)      | 116.2 (5)  | C (8)–C (9)–C (10)   | 116.1 (7)  |
| C (8)–N (2)–C (7)      | 116.2 (7)  | C (12)–C (11)–C (10) | 114.6 (10) |
| C (7)–N (2)–C (6)      | 110.7 (5)  | C (18)–C (17)–C (16) | 111.6 (6)  |
| C (1)–C (6)–N (2)      | 112.6 (6)  | C (11)–C (12)–C (13) | 112.6 (8)  |
| C (5)–C (6)–N (2)      | 111.2 (6)  | C (2)–C (3)–C (4)    | 111.0 (7)  |
| C (5)–C (6)–C (1)      | 112.0 (6)  | C (5)–C (4)–C (3)    | 111.5 (10) |

**Table S3.** Main parameters of processing and refinement of (C<sub>13</sub>H<sub>14</sub>N)<sub>2</sub>MnBr<sub>4</sub> and (C<sub>13</sub>H<sub>26</sub>N)<sub>2</sub>MnBr<sub>4</sub>.

| Compound                  | (C <sub>13</sub> H <sub>14</sub> N) <sub>2</sub> MnBr <sub>4</sub> | (C <sub>13</sub> H <sub>26</sub> N) <sub>2</sub> MnBr <sub>4</sub> |
|---------------------------|--------------------------------------------------------------------|--------------------------------------------------------------------|
| Sp.Gr.                    | P1                                                                 | P2 <sub>1</sub> /c                                                 |
| <i>a</i> , Å              | 8.51480(28)                                                        | 11.62635(35)                                                       |
| <i>b</i> , Å              | 8.63446(29)                                                        | 30.76613(89)                                                       |
| <i>c</i> , Å              | 10.66282(41)                                                       | 9.53011(32)                                                        |
| $\alpha$ , °              | 87.0893(22)                                                        | 90                                                                 |
| $\beta$ , °               | 67.2425(19)                                                        | 104.9861(22)                                                       |
| $\gamma$ , °              | 87.1786(24)                                                        | 90                                                                 |
| <i>V</i> , Å <sup>3</sup> | 721.603(45)                                                        | 3292.96(18)                                                        |
| <i>Z</i>                  | 4                                                                  | 4                                                                  |

---

| $2\theta$ -interval, ° | 7-100 | 0-0  |
|------------------------|-------|------|
| $R_{\text{wp}}$ , %    | 3.33  | 3.35 |
| $R_p$ , %              | 2.58  | 2.52 |
| $\chi^2$               | 1.81  | 1.94 |
| $R_B$ , %              | 1.94  | 2.43 |

---
